# Supplementary material
Source: PubMed Central journal article supplement (PMC7483341)
Supplement: NIHMS1595547-supplement-Supplemental_Tables.pdf [file NIHMS1595547-supplement-Supplemental_Tables.pdf]

**Table S1.** Primers for *notI* and *notI'* intron removal and amplification

| <b>Name</b>          | <b>Sequence</b>                                      | <b>Function</b> |
|----------------------|------------------------------------------------------|-----------------|
| <i>notI</i> _F       | GGAGTTCCATATGGCTATAGACGGATCT                         | amplification   |
| <i>notI</i> _F       | CAATGAAGCTTTCAACCAACCGGTATACC                        | amplification   |
| <i>notI'</i> _F_NdeI | GGAATTCCATATGGCTATAGACGCATCTGGTGCTG                  | amplification   |
| <i>notI'</i> _R      | ATAAGAATGCGGCCGCTTAATCCACCGGTATACCACCGAAG            | amplification   |
| <i>notI'</i> _MBP_F  | CTAGTGAGAATCTCTACTTCCAAGGCGCTATGGCTATAGACGCATCTGGTGC | amplification   |
| <i>notI'</i> _MBP_R  | GGTGGTGCTCGAGTGCGGCCGCAAGTTAATCCACCGGTATACCACCG      | amplification   |
| <i>notI'</i> _Int1_F | CAAGAGCTACCGTTTGGG AGACTTGATCAATGTGACCGGG            | intron removal  |
| <i>notI'</i> _Int1_R | CCCGGTCACATTGATCAAGTCTCCCAAACGGTAGCTCTTG             | intron removal  |
| <i>notI'</i> _Int2_F | CGAGTGACAGAGAAGCTAAGGTACCAAAGGGTTGCTGCAA             | intron removal  |
| <i>notI'</i> _Int2_R | TTGCAGCAACCCTTTGGTACCTTAGCTTCTCTGTCACCTCG            | intron removal  |

**Table S2.**  $^{13}\text{C}$ -NMR,  $^1\text{H}$ -NMR, gHMBCAD, and gCOSY correlations recorded at 700 MHz in  $(\text{CD}_3)_2\text{SO}-d_6$  for notoamide TI (**18**) isolated from *in vitro* reaction with NotI. HRMS (ESI-QTOF):  $m/z$   $[\text{M}+\text{H}]^+$  calculated for  $\text{C}_{26}\text{H}_{31}\text{N}_3\text{O}_4 = 450.2393$ , experimental = 450.2414. Data were measured on a Varian Vnmrs 700 spectrometer.

| Position | $\delta^{13}\text{C}$ | $\delta^1\text{H}$ (m, $J$ [Hz]) | gHMBCAD        | gCOSY |
|----------|-----------------------|----------------------------------|----------------|-------|
| 1        | 43.37                 | 3.38 obs                         |                |       |
| 2        | 29.03                 | 1.78 (m)                         |                |       |
|          |                       | 2.50 obs                         | 1,3,4,21       | 3     |
| 3        | 24.34                 | 1.78 (m)                         | 5              | 2     |
|          |                       | 1.99 (m)                         |                |       |
| 4        | 68.08                 |                                  |                |       |
| 5        | 29.57                 | 1.72 (dd, 12.8, 8.3)             | 4,6,7,21       |       |
|          |                       | 1.92 (m)                         |                | 6     |
| 6        | 55.39                 | 3.24 (m)                         | 7,18           |       |
| 7        | 44.92                 |                                  |                |       |
| 8        | 61.36                 |                                  |                |       |
| 9        | 120.29                |                                  |                |       |
| 10       | 107.49                | 6.41 (d, 8.0)                    | 9,14           | 11    |
| 11       | 123.64                | 6.81 (d, 8.0)                    | 12,13          | 10    |
| 12       | 141.35                |                                  |                |       |
| 13       | 155.27                |                                  |                |       |
| 14       | 110.05                |                                  |                |       |
| 15       | NH                    | 8.51                             |                |       |
| 16       | 183.39                |                                  |                |       |
| 17       | 33.34                 | 2.14 (d, 14.1)                   | 7,8,16,18,19   |       |
|          |                       | 2.78 (d, 14.2)                   | 6,8,9,16,18,19 |       |
| 18       | 65.53                 |                                  |                |       |
| 19       | 169.48                |                                  |                |       |
| 20       |                       |                                  |                |       |
| 21       | 173.13                |                                  |                |       |
| 22       | NH                    | 9.07                             | 4              |       |
| 23       | 23.46                 | 3.17 (m)                         | 12,13,14,24,25 | 24    |
| 24       | 122.66                | 5.13 (t, 7.0)                    |                | 25    |
| 25       | 130.43                |                                  |                |       |
| 26       | 25.57                 | 1.61 (d, 10.1)                   | 24,25,27       |       |
| 27       | 17.83                 | 1.69 (s)                         | 24,25,26       |       |
| 28       | 23.09                 | 0.68 (s)                         | 6,7,8,29       |       |
| 29       | 19.56                 | 0.70 (s)                         | 28             |       |

\*obs: These peaks are obscured by the solvent and water in the sample.

**Table S3.** Percent identity matrix of NotI/NotI' homologs including AuaG,<sup>[1]</sup> PhqK,<sup>[2]</sup> OxaD,<sup>[3]</sup> asperlicin C monooxygenase (GenBank: GBF62818.1), FMO from *Penicillium griseofulvum* (GenBank: KXG49074.1), NotI, NotI', NotB,<sup>[4]</sup> and BvnB<sup>[5]</sup> (generated using Clustal2.1).<sup>[6]</sup>

|                        | AuaG   | PhqK   | OxaD   | Asperlicin C FMO | <i>P. griseofulvum</i> | NotI   | NotI'  | NotB   | BvnB   |
|------------------------|--------|--------|--------|------------------|------------------------|--------|--------|--------|--------|
| AuaG                   | 100.00 | 25.33  | 25.86  | 22.75            | 20.37                  | 25.20  | 26.26  | 23.48  | 24.40  |
| PhqK                   | 25.33  | 100.00 | 33.71  | 35.78            | 33.55                  | 34.91  | 33.96  | 31.82  | 32.34  |
| OxaD                   | 25.86  | 33.71  | 100.00 | 35.43            | 41.14                  | 36.72  | 37.88  | 36.20  | 35.57  |
| Asperlicin C FMO       | 22.75  | 35.78  | 35.43  | 100.00           | 44.30                  | 42.13  | 41.44  | 38.48  | 35.51  |
| <i>P. griseofulvum</i> | 20.37  | 33.55  | 41.14  | 44.30            | 100.00                 | 40.51  | 39.81  | 44.15  | 42.95  |
| NotI                   | 25.20  | 34.91  | 36.72  | 42.13            | 40.51                  | 100.00 | 84.99  | 45.03  | 42.92  |
| NotI'                  | 26.26  | 33.96  | 37.88  | 41.44            | 39.81                  | 84.99  | 100.00 | 43.42  | 41.76  |
| NotB                   | 23.48  | 31.82  | 36.20  | 38.48            | 44.15                  | 45.03  | 43.42  | 100.00 | 62.14  |
| BvnB                   | 24.40  | 32.34  | 35.57  | 35.51            | 42.95                  | 42.92  | 41.76  | 62.14  | 100.00 |

**Table S4.** Average percent conversions for NotI and NotI' with natural substrates (+)-stephacidin A (**9**), (-)-stephacidin A (**4**), (+)-6-*epi*-stephacidin A (**6**), and (-)-6-*epi*-stephacidin A (**7**). Reactions were performed in triplicate and conversions were calculated via substrate and product standard curves.

| Substrate                                     | Product                           | NotI conv (%) | NotI' conv (%) |
|-----------------------------------------------|-----------------------------------|---------------|----------------|
| (+)-Stephacidin A ( <b>9</b> )                | (-)-Notoamide B ( <b>10</b> )     | 11            | 9              |
| (-)-Stephacidin A ( <b>4</b> )                | (+)-Notoamide B ( <b>5</b> )      | 68            | 52             |
| (+)-6- <i>epi</i> -Stephacidin A ( <b>6</b> ) | (+)-Versicolamide B ( <b>8</b> )  | 13            | 7              |
| (-)-6- <i>epi</i> -Stephacidin A ( <b>7</b> ) | (-)-Versicolamide B ( <b>11</b> ) | 0             | 0              |
