# Supplementary material
Source: PubMed Central journal article supplement (PMC7483341)

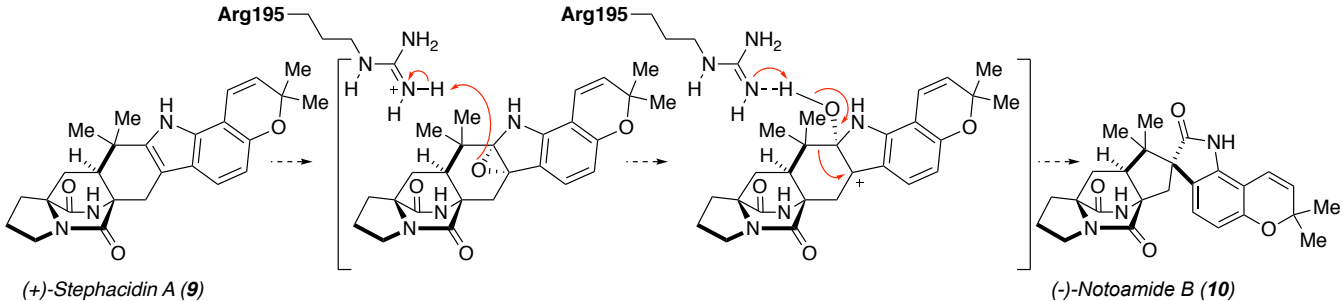

Supplement: NIHMS1595547-supplement-Scheme_3.pdf [file NIHMS1595547-supplement-Scheme_3.pdf]
